# Supplementary material for: Use of a Longer Aglycon Moiety Bearing Sialyl α(2→3) Lactoside on the Glycopolymer for Lectin Evaluation
Source: MDPI journal article supplement (doi:10.3390/polym15040998), 2023-02-17
Supplement: s1 [file s1]

## Use of longer aglycon bearing with sialyl $\alpha(2\rightarrow3)$ lactoside on the glycopolymer for lectin evaluation

Ryota Adachi<sup>1</sup>, Takahiko Matsushita<sup>1,2,3</sup>, Tetsuo Koyama<sup>1</sup>, Ken Hatano<sup>1,2,3</sup>, and Koji Matsuoka<sup>1,2,3,\*</sup>

- 1 Area for Molecular Function, Division of Material Science, Graduate School of Science and Engineering, Saitama University, Sakura, Saitama 338-8570, Japan; r.adachi.764@ms.saimata-u.ac.jp (R.A); takahiko@fms.saitama-u.ac.jp (T.M.); koyama@fms.saitama-u.ac.jp (T.K.); khatano@fms.saitama-u.ac.jp (K.H)
- 2 Medical Innovation Research Unit (MiU), Advanced Institute of Innovative Technology (AIIT), Saitama University, Sakura, Saitama 338-8570, Japan
- 3 Area for Health Science, Strategic Research Center, Saitama University, Sakura, Saitama 338-8570, Japan
- \* Correspondence:koji@fms.saitama-u.ac.jp; Tel.: +81-7088194601 (K.M.)

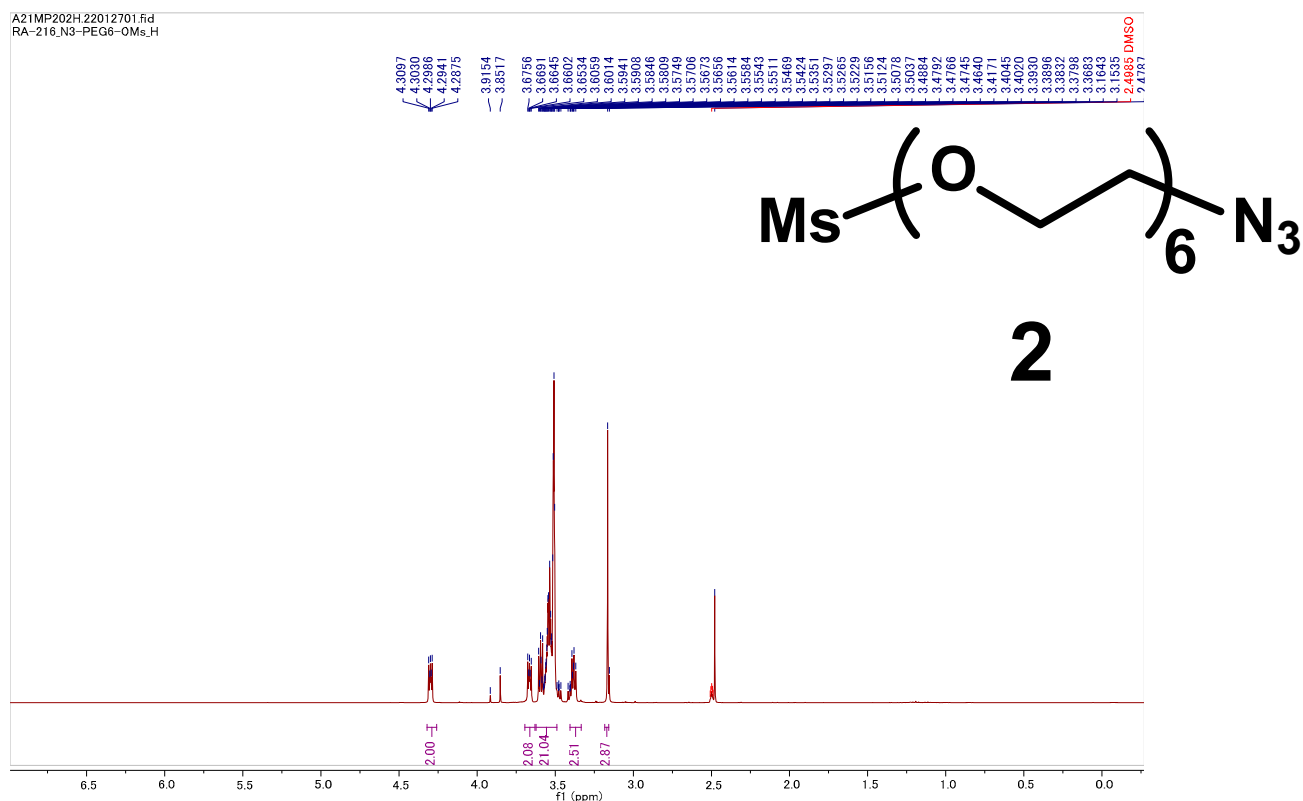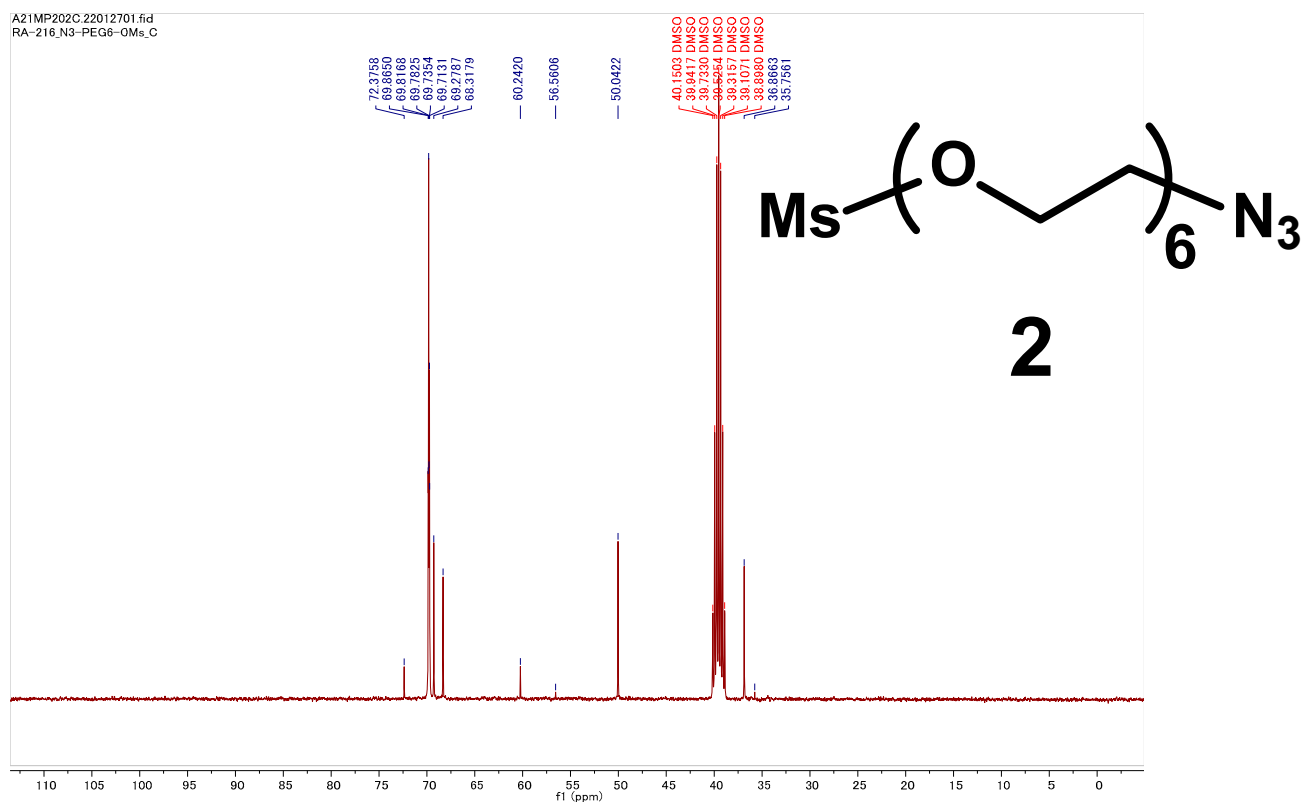

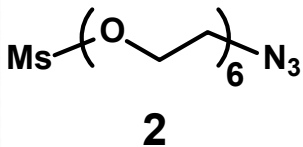

**Figure S3.** IR spectrum of 17-azido-3,6,9,12,15-pentaoxaheptadecyl methanesulfonate (**2**)

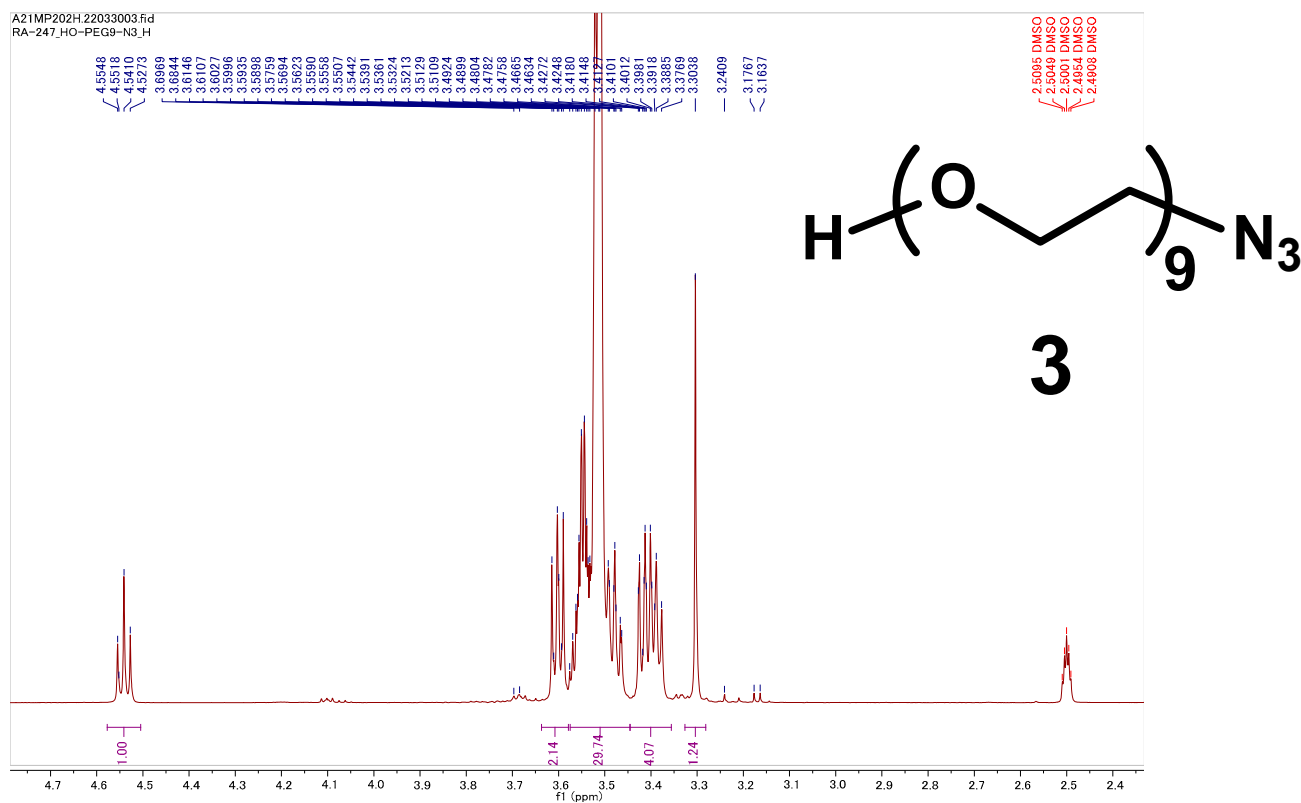

**Figure S4.** <sup>1</sup>H NMR spectrum of 26-azido-3,6,9,12,15,18,21,24-octaoxahexacosan-1-ol (**3**) in DMSO-*d*<sub>6</sub>

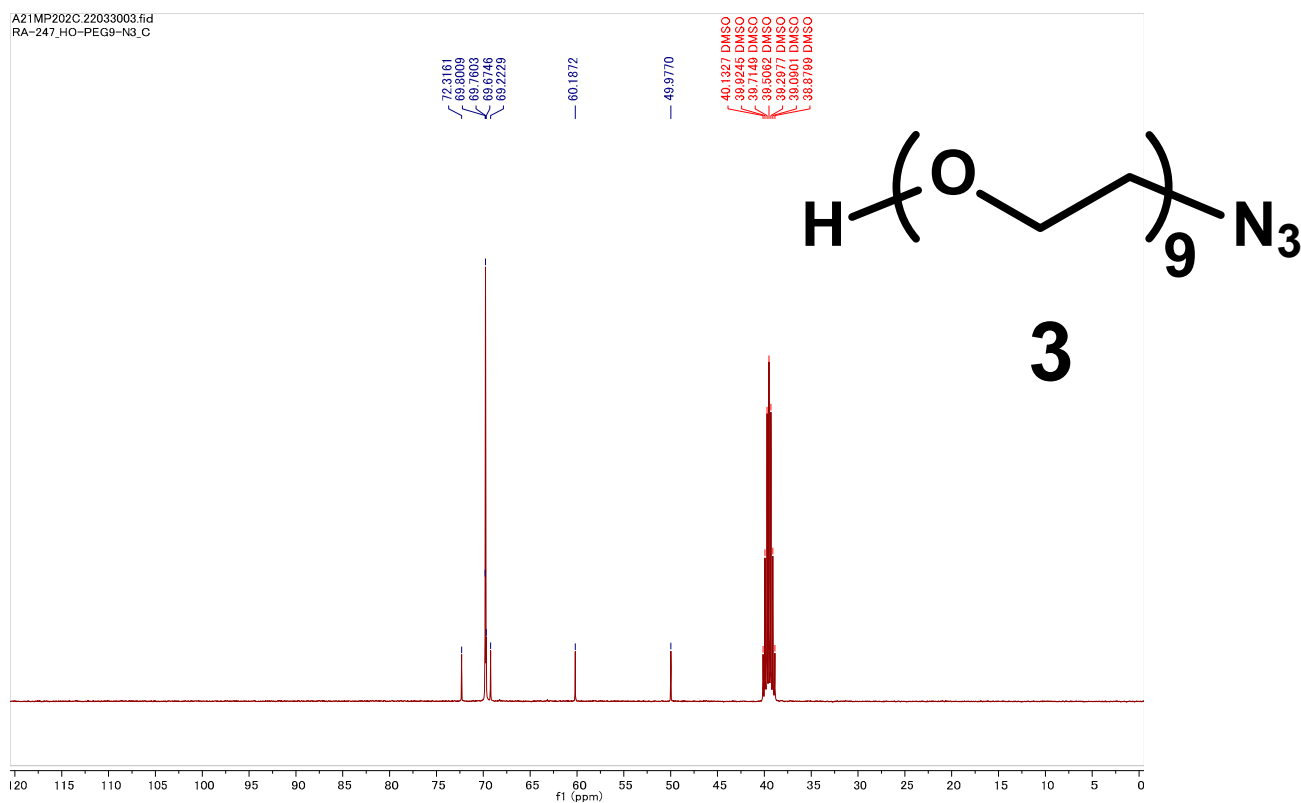

**Figure S5.** <sup>13</sup>C NMR spectrum of 26-azido-3,6,9,12,15,18,21,24-octaoxahexacosan-1-ol (**3**) in DMSO-*d*<sub>6</sub>

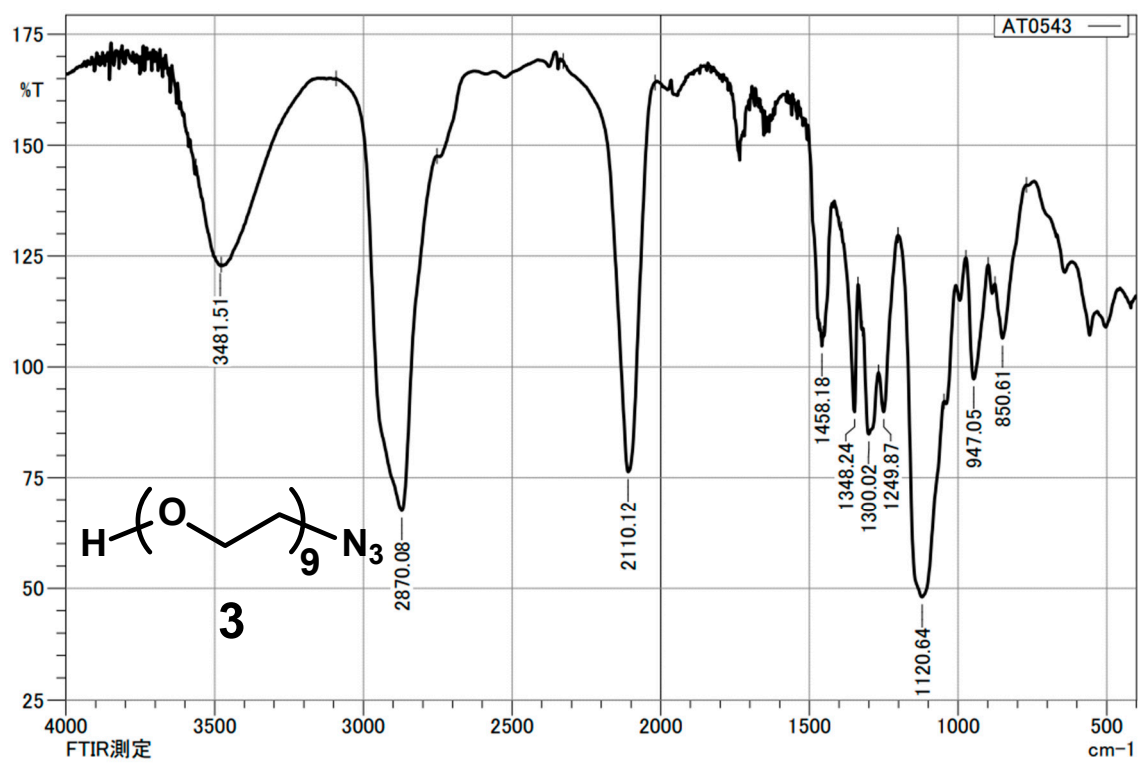

**Figure S6.** IR spectrum of 26-azido-3,6,9,12,15,18,21,24-octaoxahexacosan-1-ol (**3**)

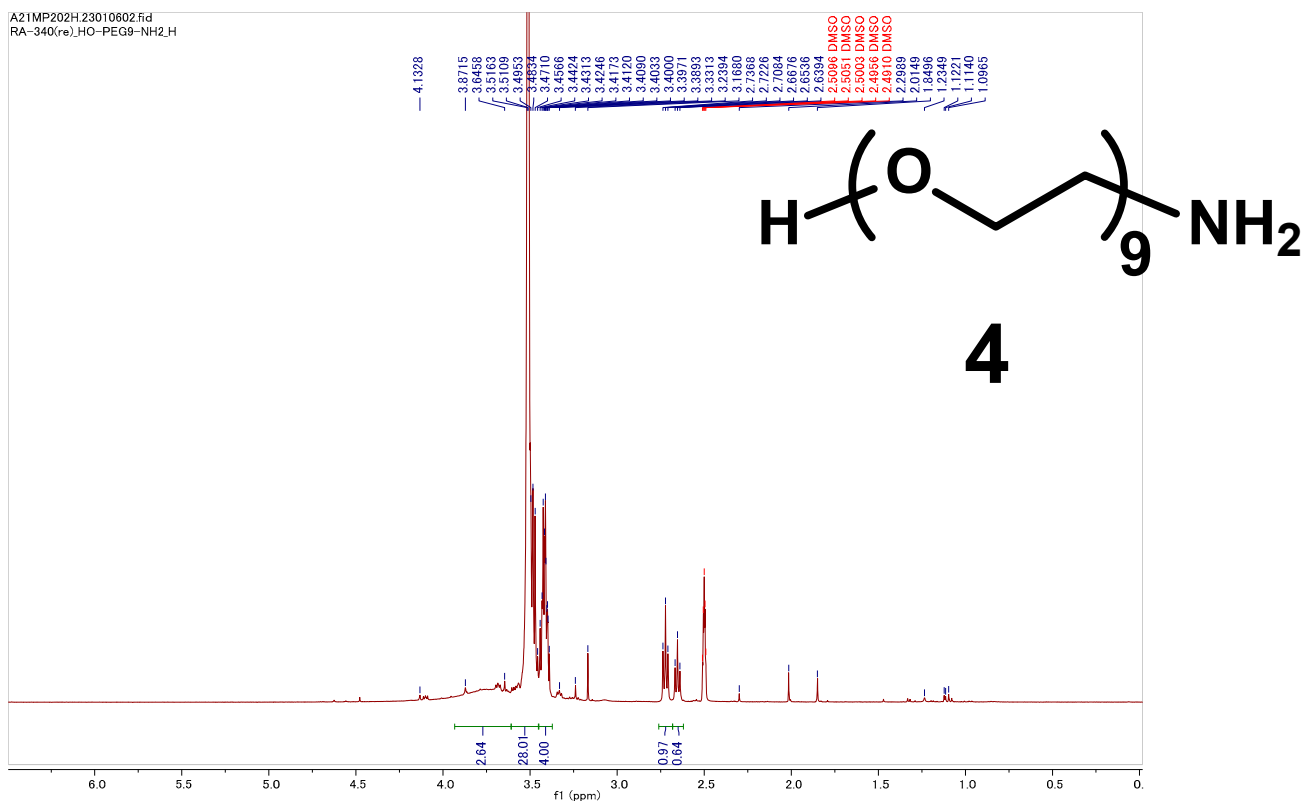

**Figure S7.**  $^1\text{H}$  NMR spectrum of 26-amino-3,6,9,12,15,18,21,24-octaoxahexacosan-1-ol (**4**) in  $\text{DMSO-}d_6$

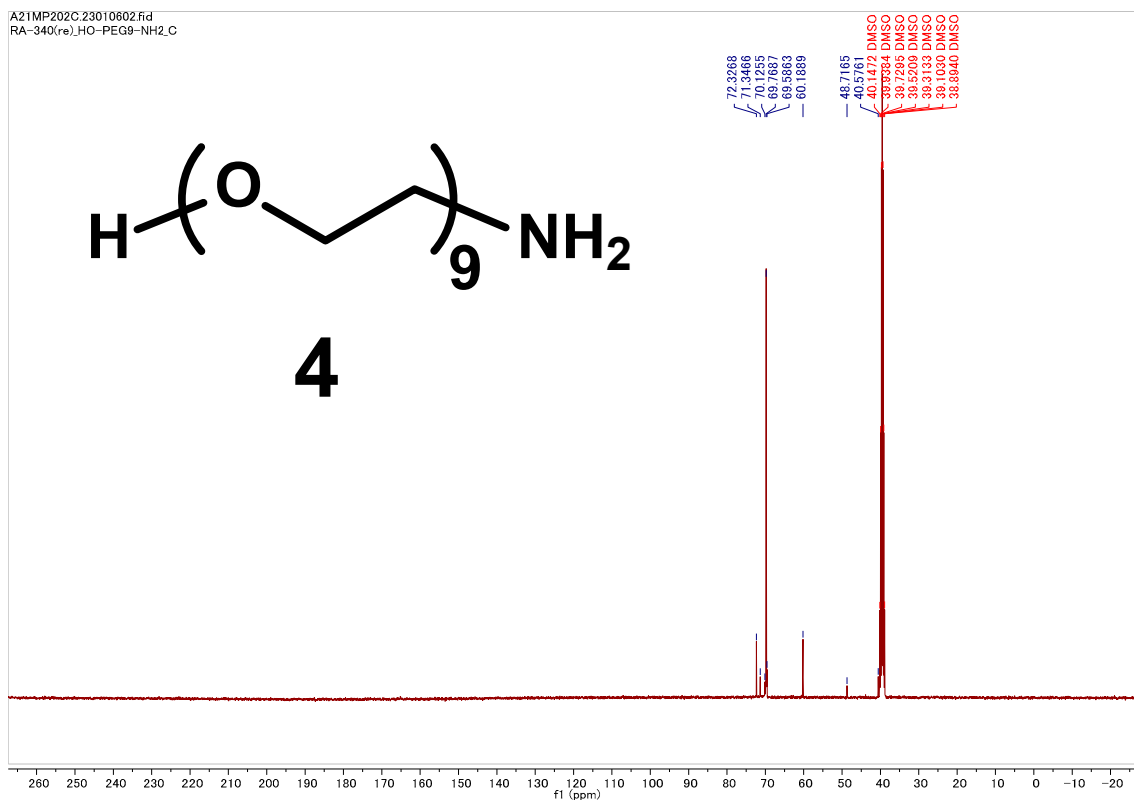

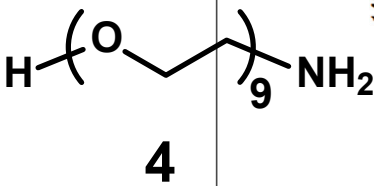

**Figure S9.** IR spectrum of 26-amino-3,6,9,12,15,18,21,24-octaoxahexacosan-1-ol (**4**)

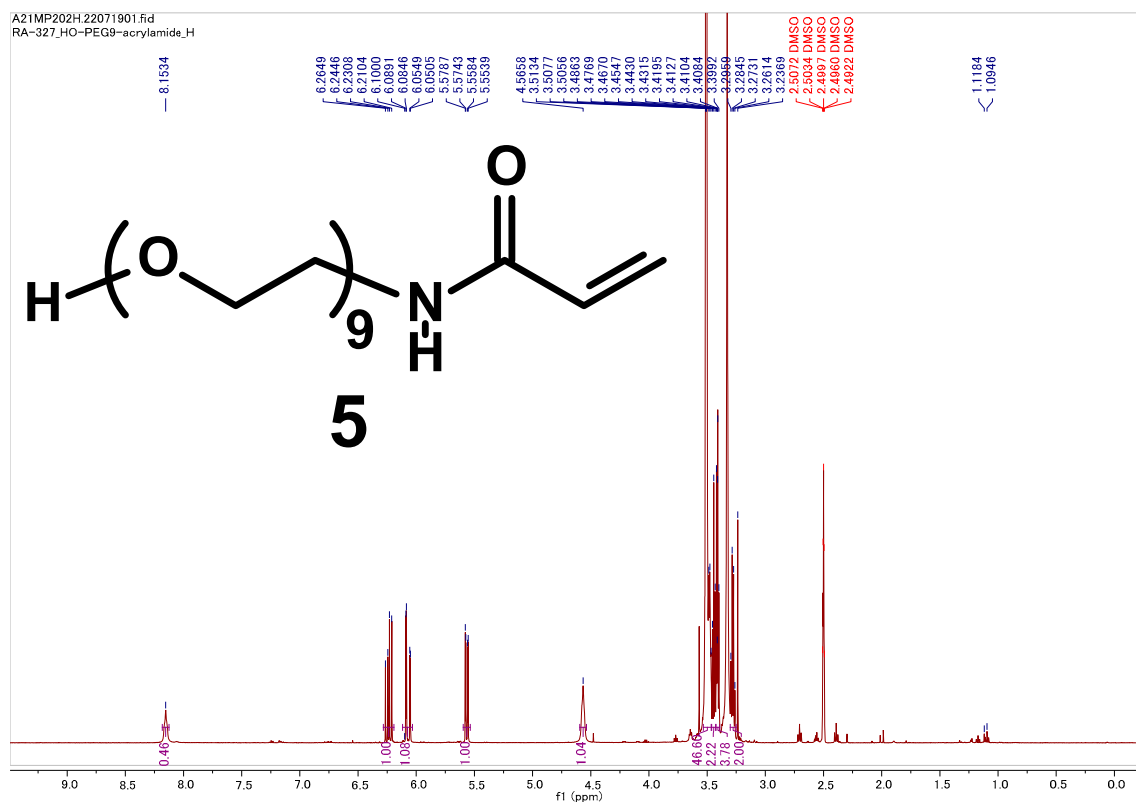

**Figure S10.**  $^1\text{H}$  NMR spectrum of *N*-(26-hydroxy-3,6,9,12,15,18,21,24-octaoxahehexacosyl)acrylamide (**5**) in  $\text{DMSO-}d_6$

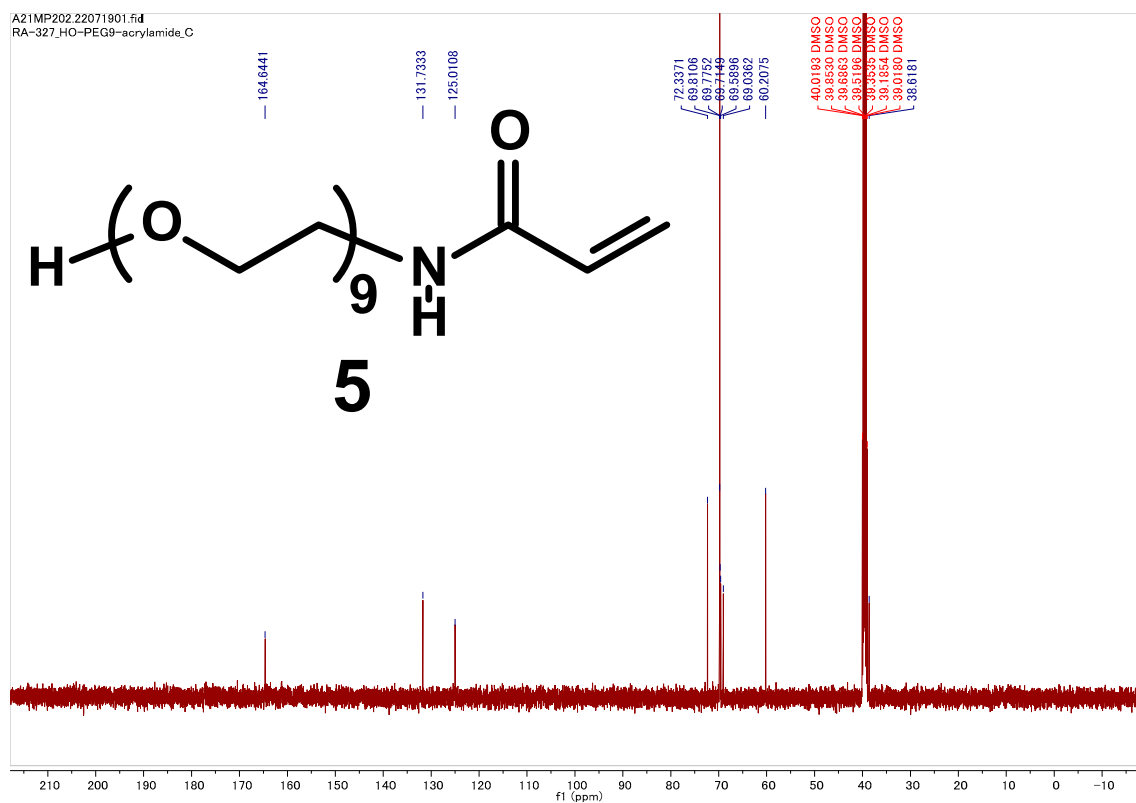

**Figure S11.**  $^{13}\text{C}$  NMR spectrum of *N*-(26-hydroxy-3,6,9,12,15,18,21,24-octaoxahehexacosyl)acrylamide (**5**) in  $\text{DMSO-}d_6$



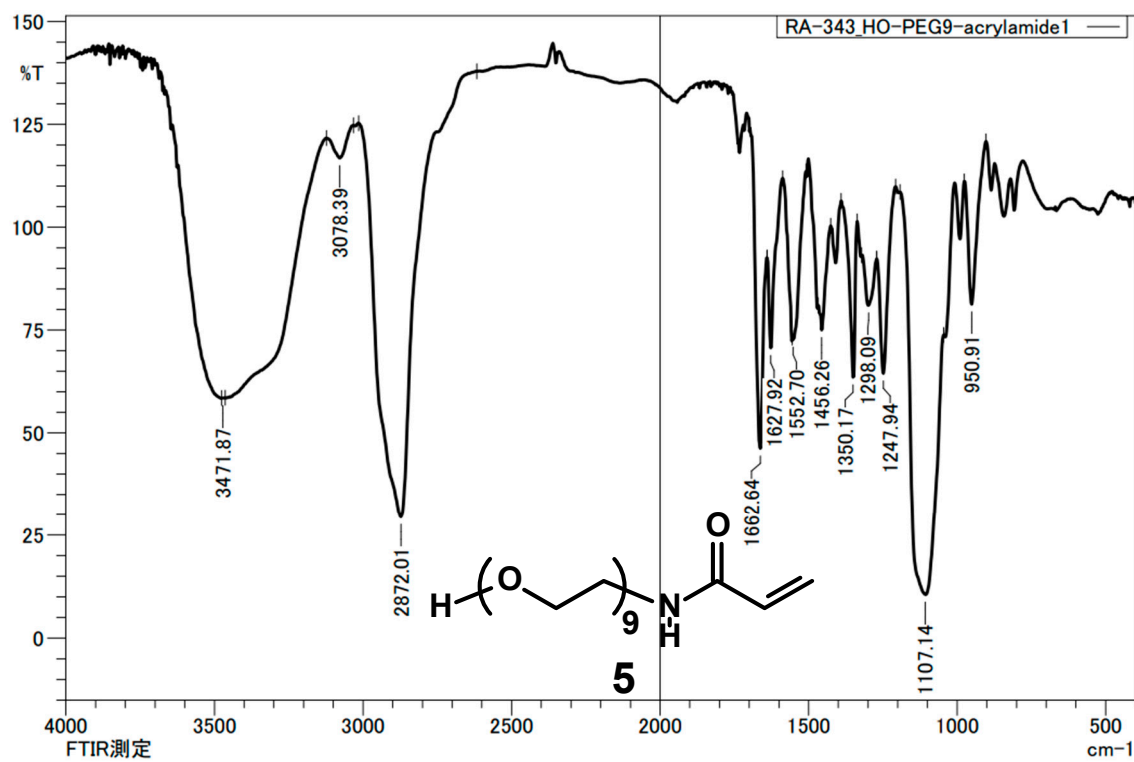

**Figure S12.** IR spectrum of *N*-(26-hydroxy-3,6,9,12,15,18,21,24-octaoxahexacosyl)acrylamide (**5**)

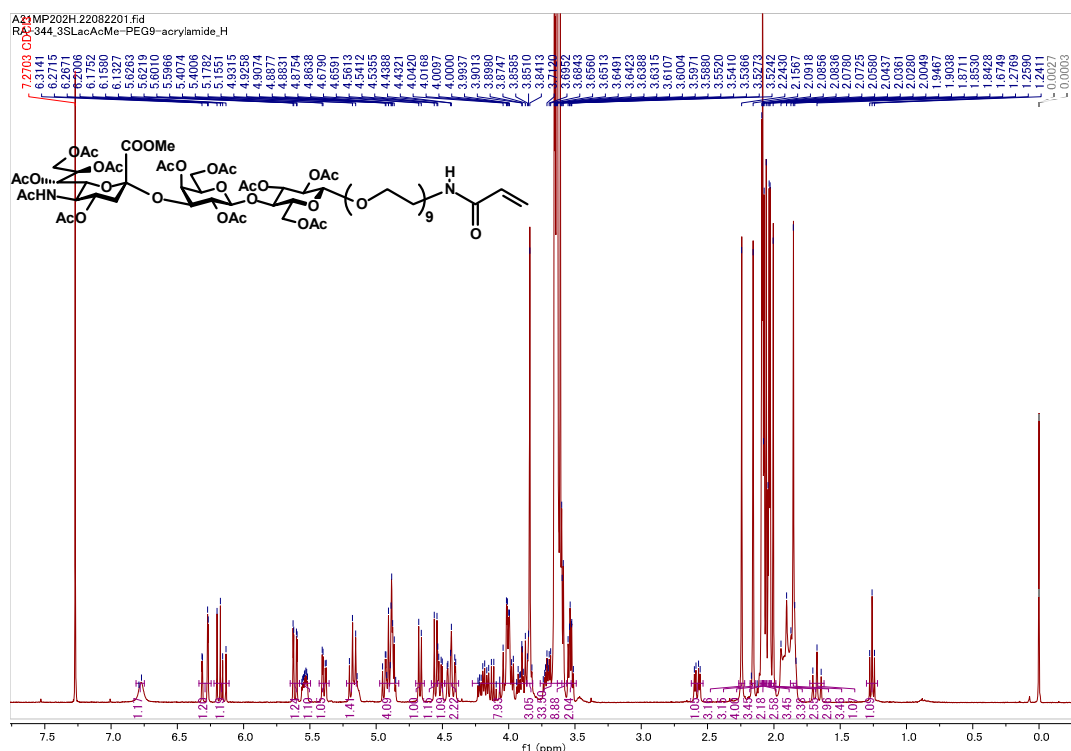

**Figure S13.**  $^1\text{H}$  NMR spectrum of 28-oxo-3,6,9,12,15,18,21,24-octaoxa-27-azatriacont-29-en-1-yl [Methyl(5-acetamido-4,7,8,9-tetra-*O*-acetyl-3,5-dideoxy- $\underline{\text{D}}$ -glycero- $\alpha$ - $\underline{\text{D}}$ -galacto-2-nonulopyranosyl)onate]-(2 $\rightarrow$ 3)-*O*-(2,4,6-tri-*O*-acetyl- $\beta$ - $\underline{\text{D}}$ -galactopyranosyl)-(1 $\rightarrow$ 4)-2,3,6-tri-*O*-acetyl- $\beta$ - $\underline{\text{D}}$ -glucopyranoside (**7**) in  $\text{CDCl}_3$

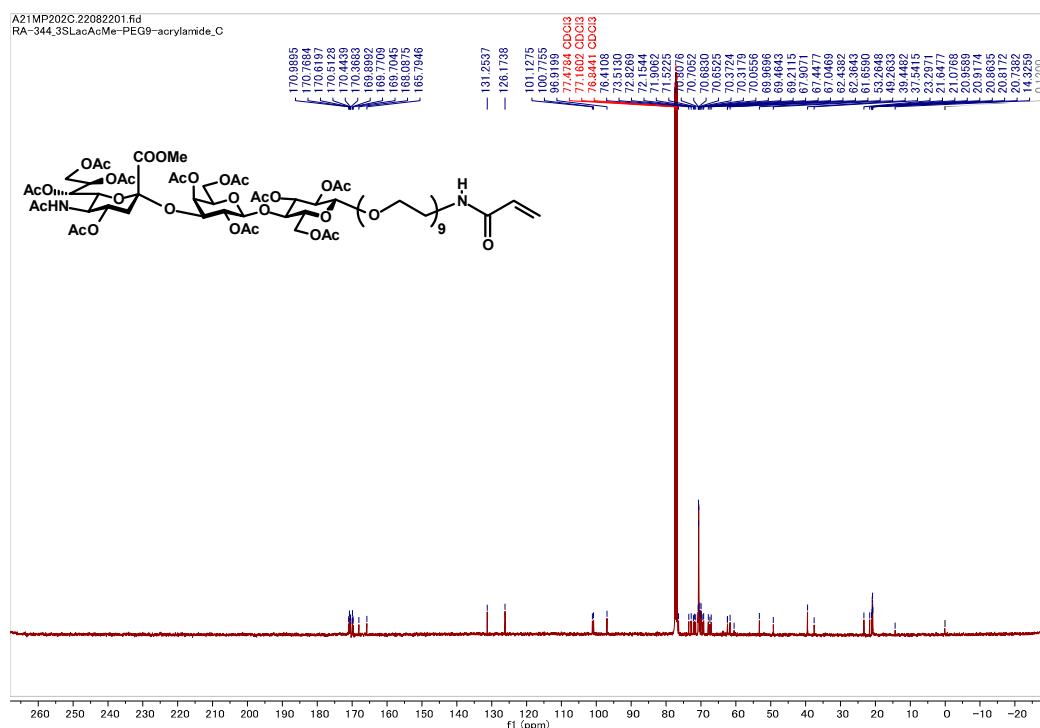

**Figure S14.**  $^{13}\text{C}$  NMR spectrum of 28-oxo-3,6,9,12,15,18,21,24-octaoxa-27-azatriacont-29-en-1-yl [Methyl(5-acetamido-4,7,8,9-tetra-*O*-acetyl-3,5-dideoxy- $\underline{\text{D}}$ -glycero- $\alpha$ - $\underline{\text{D}}$ -galacto-2-nonulopyranosyl)onate]-(2 $\rightarrow$ 3)-*O*-(2,4,6-tri-*O*-acetyl- $\beta$ - $\underline{\text{D}}$ -galactopyranosyl)-(1 $\rightarrow$ 4)-2,3,6-tri-*O*-acetyl- $\beta$ - $\underline{\text{D}}$ -glucopyranoside (**7**) in  $\text{CDCl}_3$

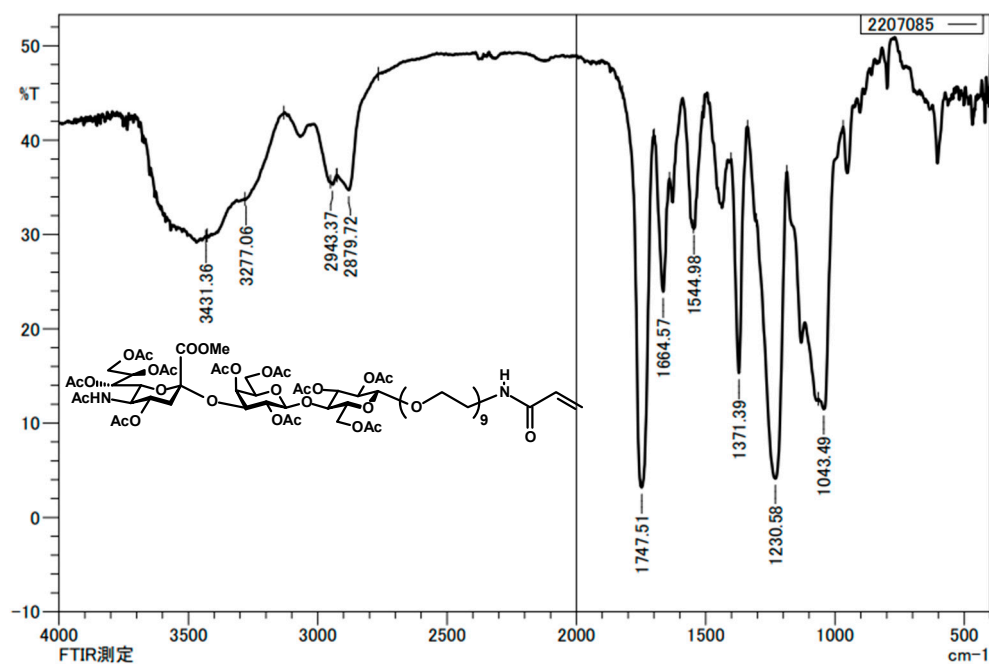

**Figure S15.** IR spectrum of 28-oxo-3,6,9,12,15,18,21,24-octaoxa-27-azatriacont-29-en-1-yl [Methyl(5-acetamido-4,7,8,9-tetra-*O*-acetyl-3,5-dideoxy-D-glycero- $\alpha$ -D-galacto-2-nonulopyranosyl)onate]-(2→3)-*O*-(2,4,6-tri-*O*-acetyl- $\beta$ -D-galactopyranosyl)-(1→4)-2,3,6-tri-*O*-acetyl- $\beta$ -D-glucopyranoside (**7**)

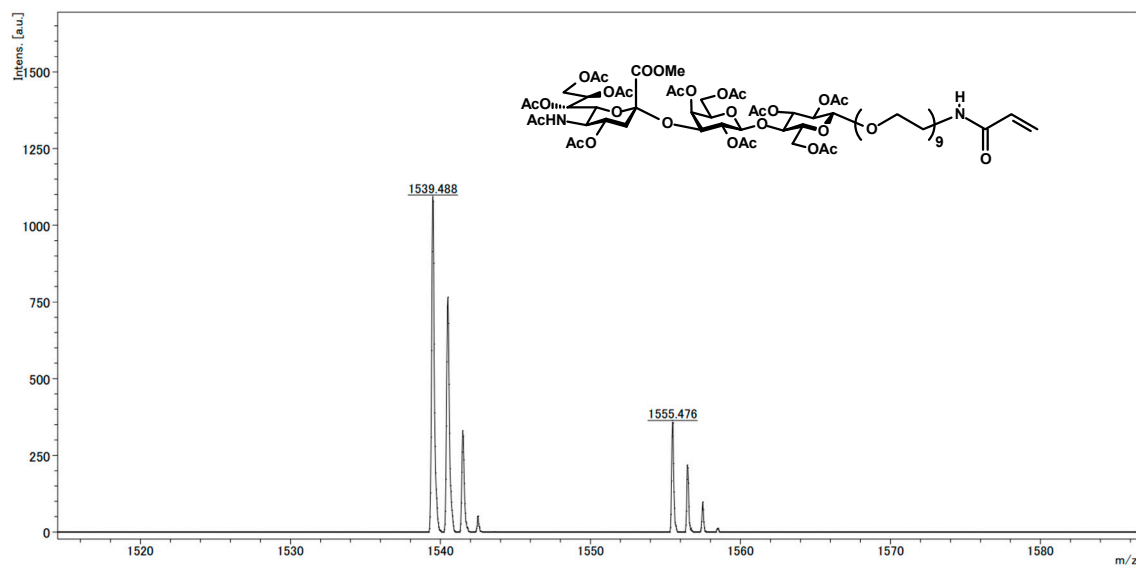

**Figure S16.** MALDI-TOF MS spectrum of 28-oxo-3,6,9,12,15,18,21,24-octaoxa-27-azatriacont-29-en-1-yl [Methyl(5-acetamido-4,7,8,9-tetra-*O*-acetyl-3,5-dideoxy-D-glycero- $\alpha$ -D-galacto-2-nonulopyranosyl)onate]-(2→3)-*O*-(2,4,6-tri-*O*-acetyl- $\beta$ -D-galactopyranosyl)-(1→4)-2,3,6-tri-*O*-acetyl- $\beta$ -D-glucopyranoside (**7**)

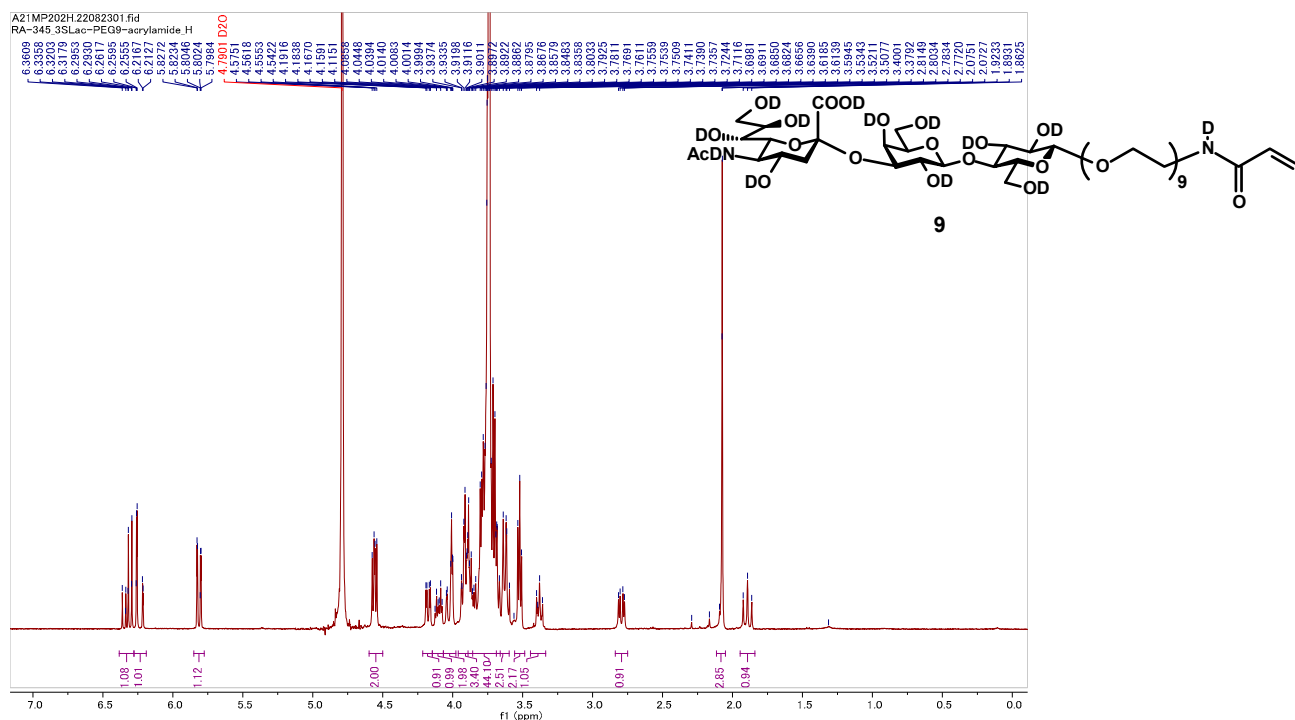

**Figure S17.**  $^1\text{H}$  NMR spectrum of 28-oxo-3,6,9,12,15,18,21,24-octaoxa-27-azatriacont-29-en-1-yl (5-acetamido-3,5-dideoxy- $\underline{\underline{D}}$ -glycero- $\alpha$ - $\underline{\underline{D}}$ -galacto-2-nonulopyranosyl)-(2 $\rightarrow$ 3)-*O*-( $\beta$ - $\underline{\underline{D}}$ -galactopyranosyl)-(1 $\rightarrow$ 4)- $\beta$ - $\underline{\underline{D}}$ -glucopyranoside (**7**) in  $\text{D}_2\text{O}$

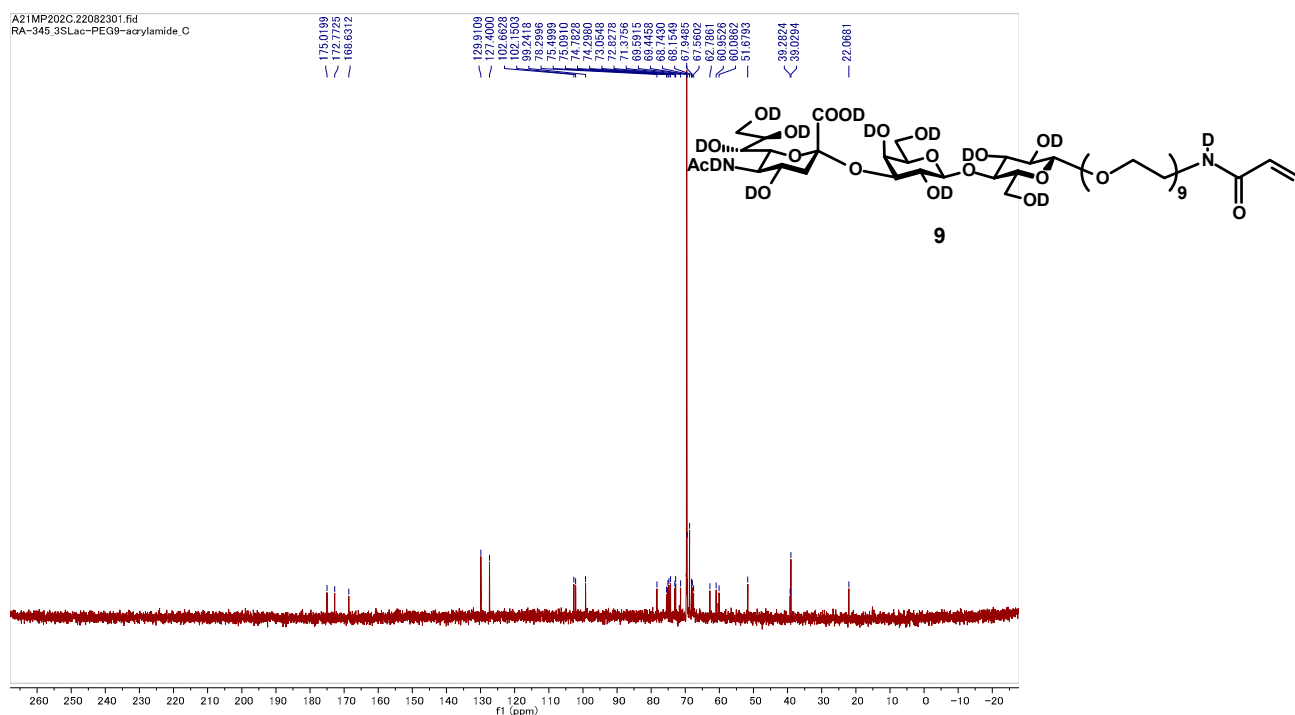

**Figure S18.**  $^{13}\text{C}$  NMR spectrum of 28-oxo-3,6,9,12,15,18,21,24-octaoxa-27-azatriacont-29-en-1-yl (5-acetamido-3,5-dideoxy- $\underline{\underline{D}}$ -glycero- $\alpha$ - $\underline{\underline{D}}$ -galacto-2-nonulopyranosyl)-(2 $\rightarrow$ 3)-*O*-( $\beta$ - $\underline{\underline{D}}$ -galactopyranosyl)-(1 $\rightarrow$ 4)- $\beta$ - $\underline{\underline{D}}$ -glucopyranoside (**7**) in  $\text{D}_2\text{O}$

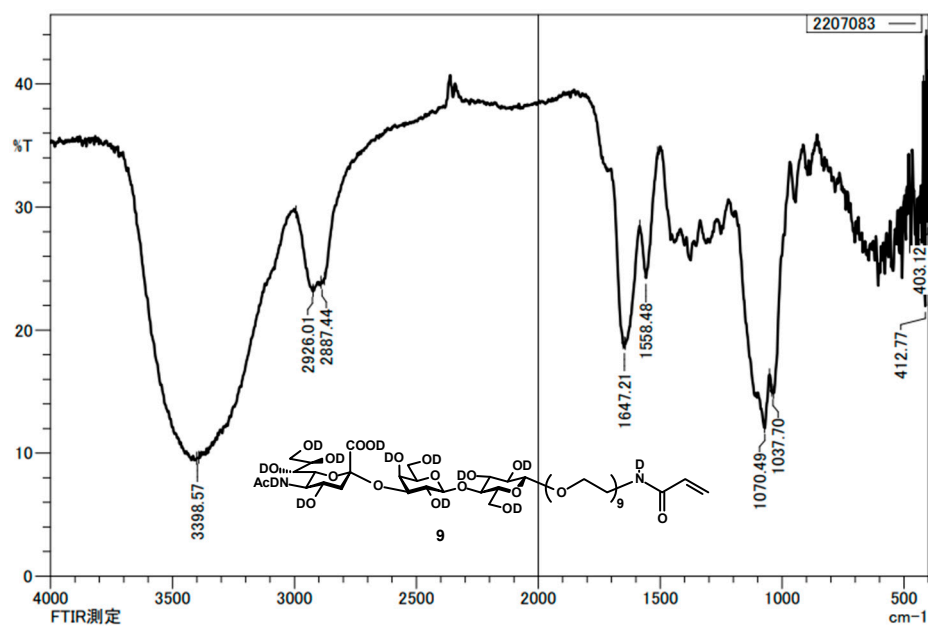

**Figure S19.** IR spectrum of 28-oxo-3,6,9,12,15,18,21,24-octaoxa-27-azatriacont-29-en-1-yl (5-acetamido-3,5-dideoxy-D-glycero- $\alpha$ -D-galacto-2-nonulopyranosyl)-(2→3)-*O*-( $\beta$ -D-galactopyranosyl)-(1→4)- $\beta$ -D-glucopyranoside (**7**)

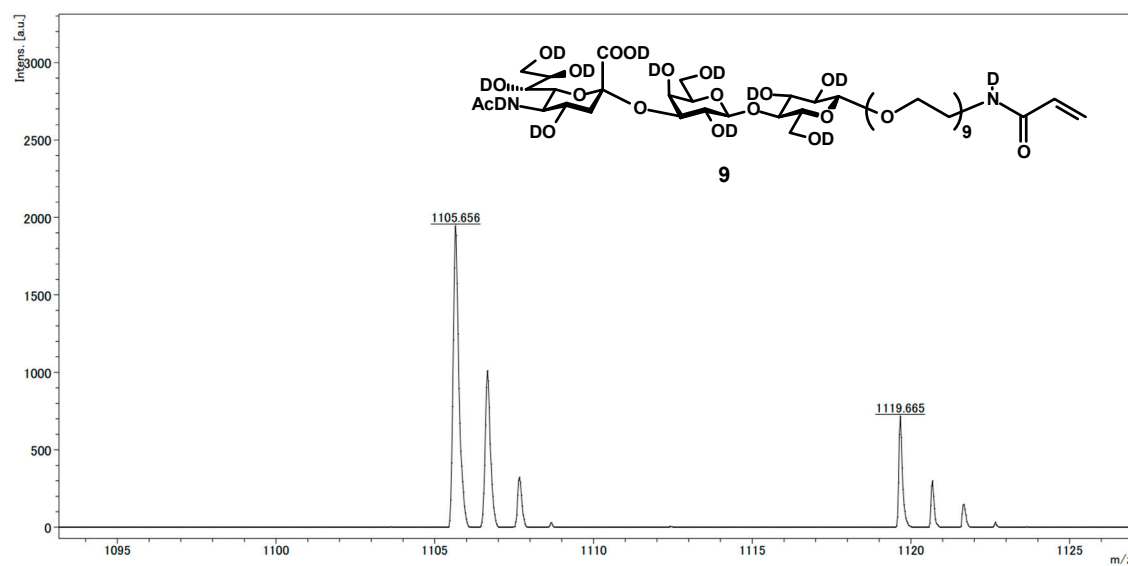

**Figure S20.** MALDI-TOF MS spectrum of 28-oxo-3,6,9,12,15,18,21,24-octaoxa-27-azatriacont-29-en-1-yl (5-acetamido-3,5-dideoxy-D-glycero- $\alpha$ -D-galacto-2-nonulopyranosyl)-(2→3)-*O*-( $\beta$ -D-galactopyranosyl)-(1→4)- $\beta$ -D-glucopyranoside (**7**)

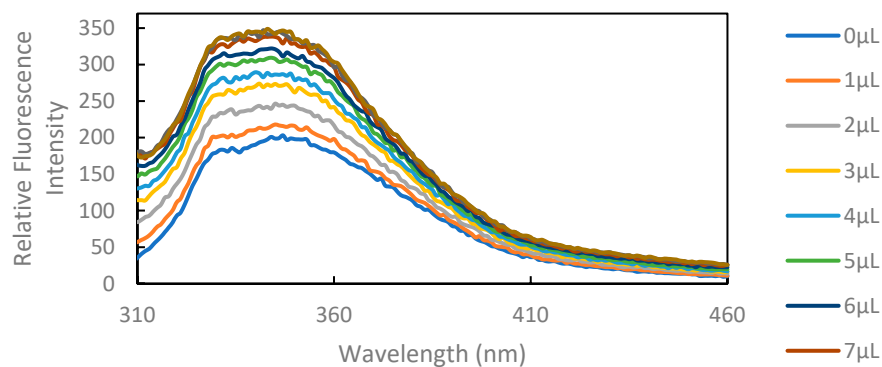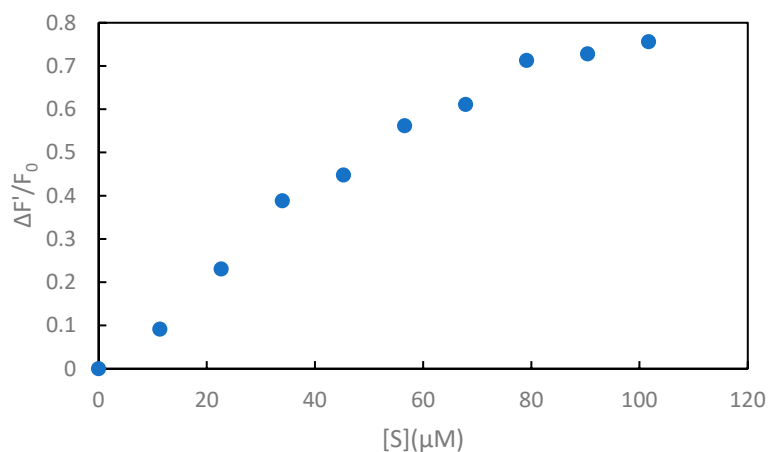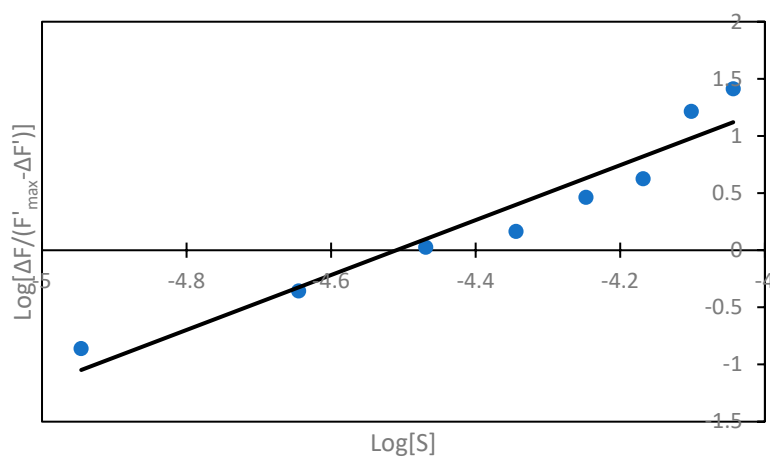

**Figure S21.** Biological evaluations of the WGA—carbohydrate interaction using glycomonomer **9**. (Top) Changes in fluorescence emission spectra of WGA (0.65 μM, 3.0 mL, 50 mM Tris-HCl buffer containing 1.25 M NaCl and 25 mM CaCl<sub>2</sub>, pH 7.5, 4 ± 0.1 °C). (Middle) Plots of  $\Delta F'/F_0$  versus  $[S]$ , where  $\Delta F'$  is change in the intensity at 348 nm of WGA with various concentrations,  $F_0$  is the intensity of WGA alone, and  $[S]$  is the total ligand concentration based on the sugar residue concentration. (Bottom) Hill plots of  $\log[\Delta F'/(F'_{\text{max}} - \Delta F')]$  versus  $\log[S]$ .

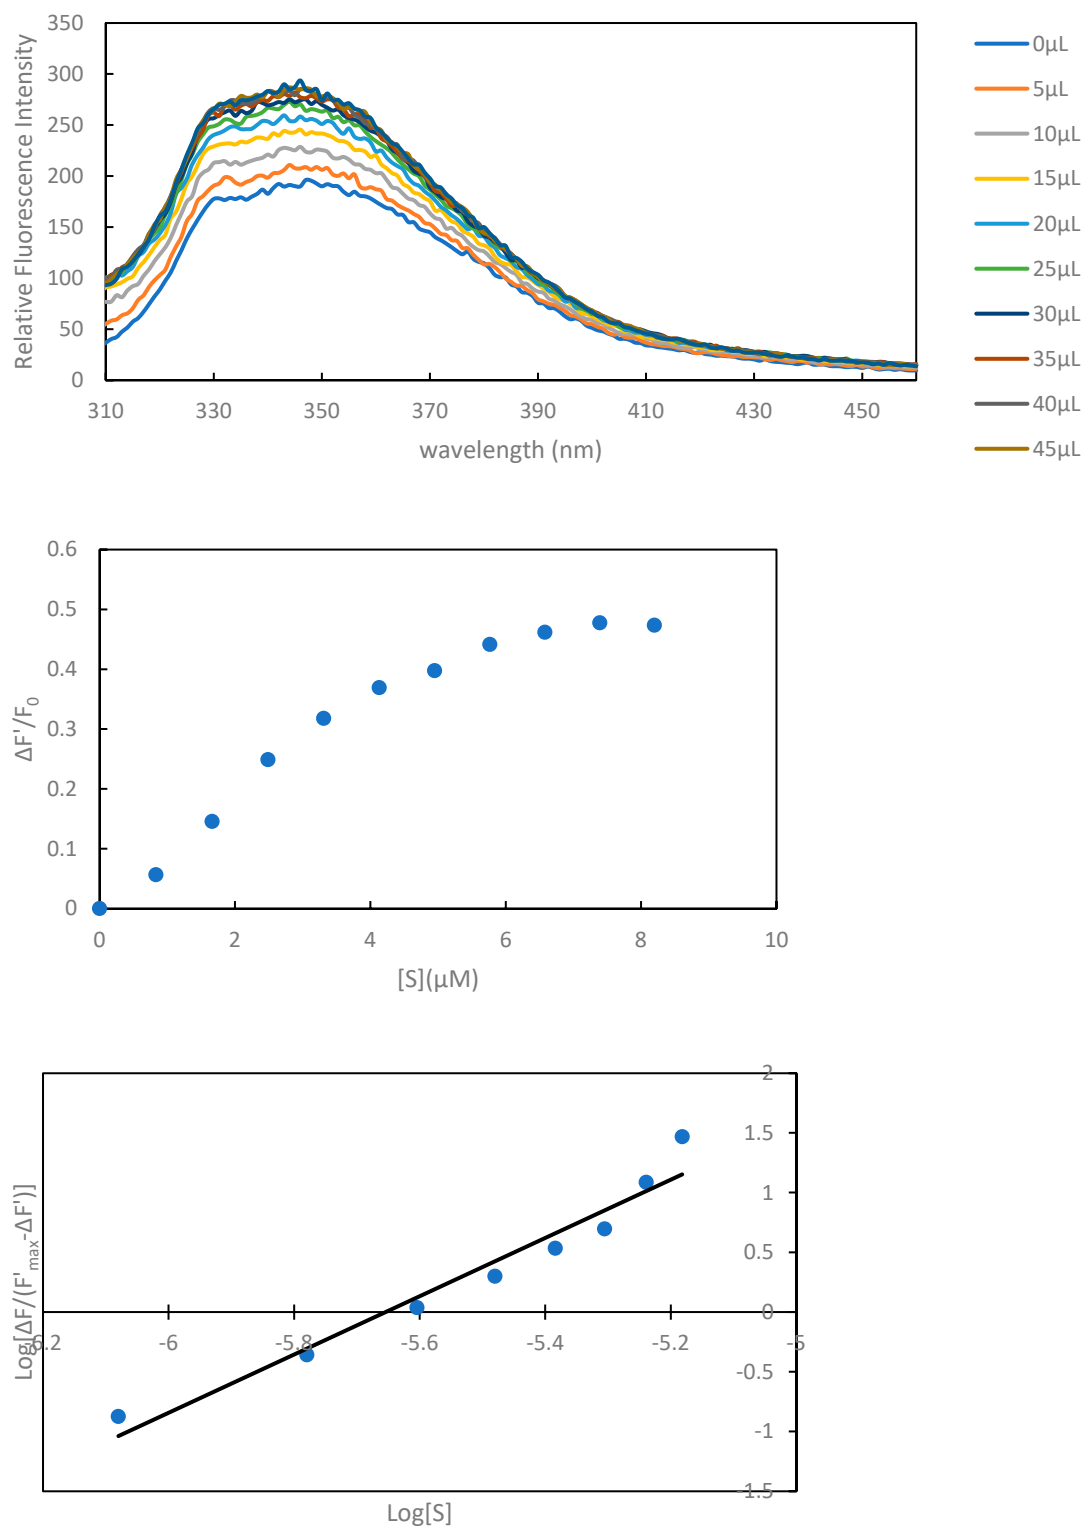

**Figure S22.** Biological evaluations of the WGA—carbohydrate interaction using homopolymer **10a**. (Top) Changes in fluorescence emission spectra of WGA (0.65  $\mu\text{M}$ , 3.0 mL, 50 mM Tris-HCl buffer containing 1.25 M NaCl and 25 mM  $\text{CaCl}_2$ , pH 7.5,  $4 \pm 0.1$   $^\circ\text{C}$ ). (Middle) Plots of  $\Delta F'/F_0$  versus  $[S]$ , where  $\Delta F'$  is change in the intensity at 348 nm of WGA with various concentrations,  $F_0$  is the intensity of WGA alone, and  $[S]$  is the total ligand concentration based on the sugar residue concentration. (Bottom) Hill plots of  $\text{log} [\Delta F'/(F'_{\text{max}} - \Delta F')]$  versus  $\text{log} [S]$ .

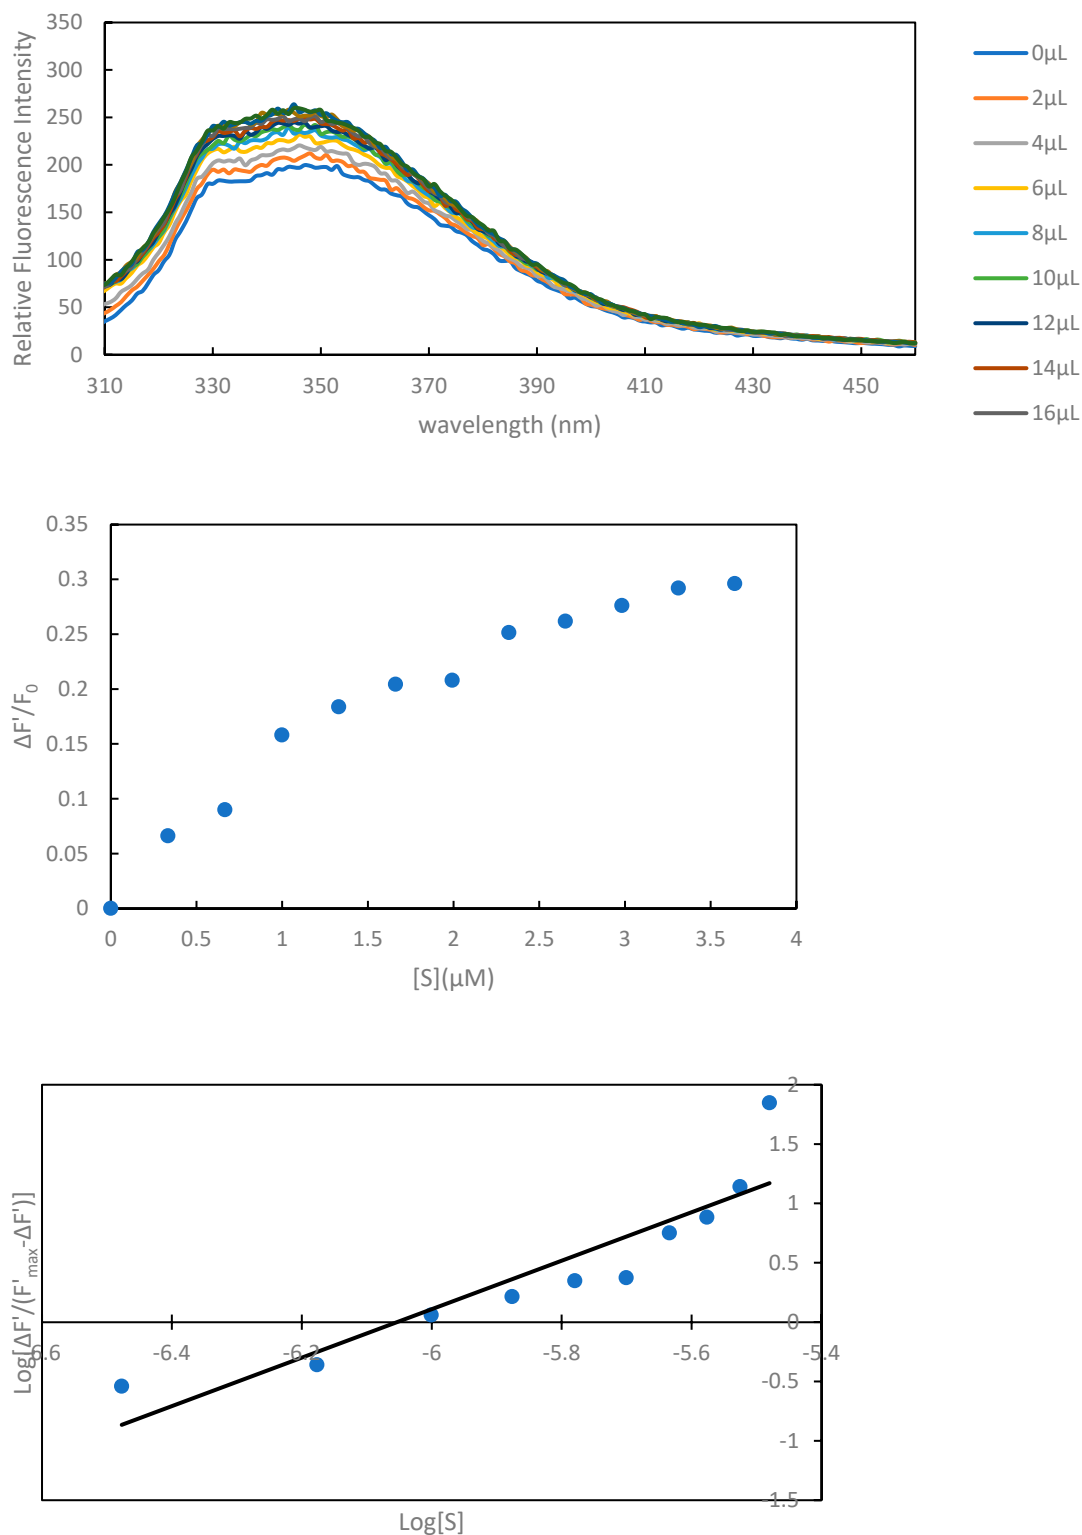

**Figure S23.** Biological evaluations of the WGA—carbohydrate interaction using copolymer **10b**. (Top) Changes in fluorescence emission spectra of WGA (0.65 μM, 3.0 mL, 50 mM Tris-HCl buffer containing 1.25 M NaCl and 25 mM CaCl<sub>2</sub>, pH 7.5, 4 ± 0.1 °C). (Middle) Plots of  $\Delta F'/F_0$  versus  $[S]$ , where  $\Delta F'$  is change in the intensity at 348 nm of WGA with various concentrations,  $F_0$  is the intensity of WGA alone, and  $[S]$  is the total ligand concentration based on the sugar residue concentration. (Bottom) Hill plots of  $\log[\Delta F'/(F'_{\max}-\Delta F')]$  versus  $\log[S]$ .



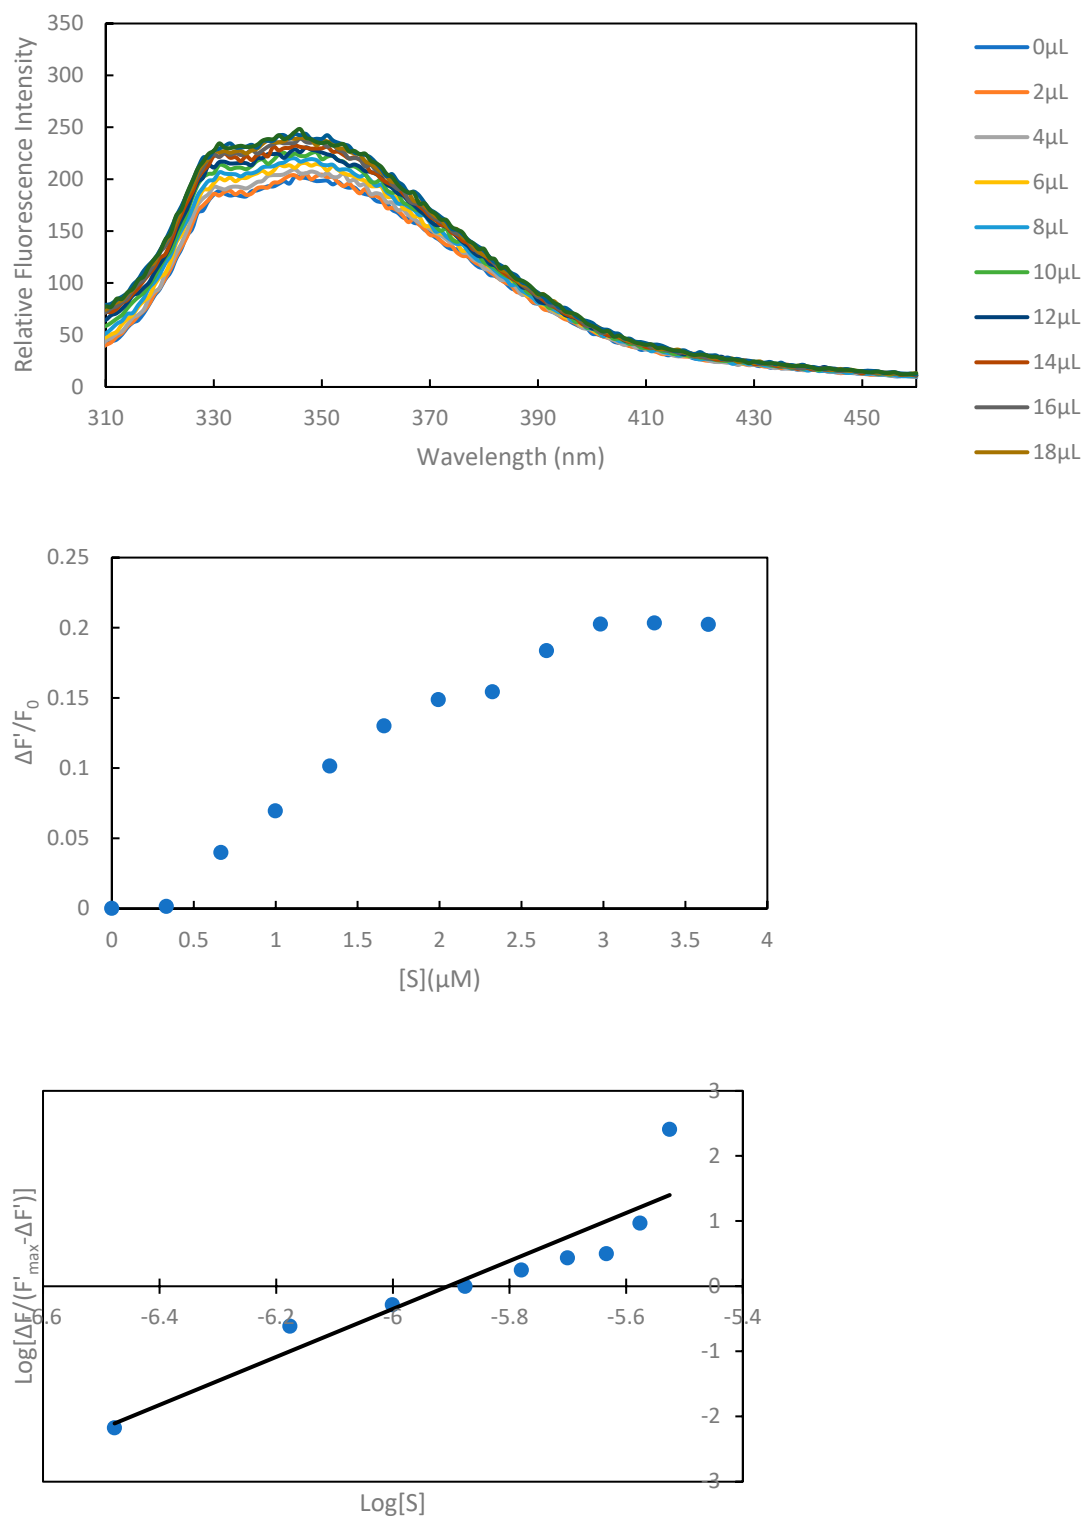

**Figure S24.** Biological evaluations of the WGA—carbohydrate interaction using copolymer **10c**. (Top) Changes in fluorescence emission spectra of WGA (0.65 μM, 3.0 mL, 50 mM Tris-HCl buffer containing 1.25 M NaCl and 25 mM CaCl<sub>2</sub>, pH 7.5, 4 ± 0.1 °C). (Middle) Plots of  $\Delta F'/F_0$  versus  $[S]$ , where  $\Delta F'$  is change in the intensity at 348 nm of WGA with various concentrations,  $F_0$  is the intensity of WGA alone, and  $[S]$  is the total ligand concentration based on the sugar residue concentration. (Bottom) Hill plots of  $\text{log} [\Delta F'/(F'_{\text{MAX}} - \Delta F')]$  versus  $\text{log} [S]$ .

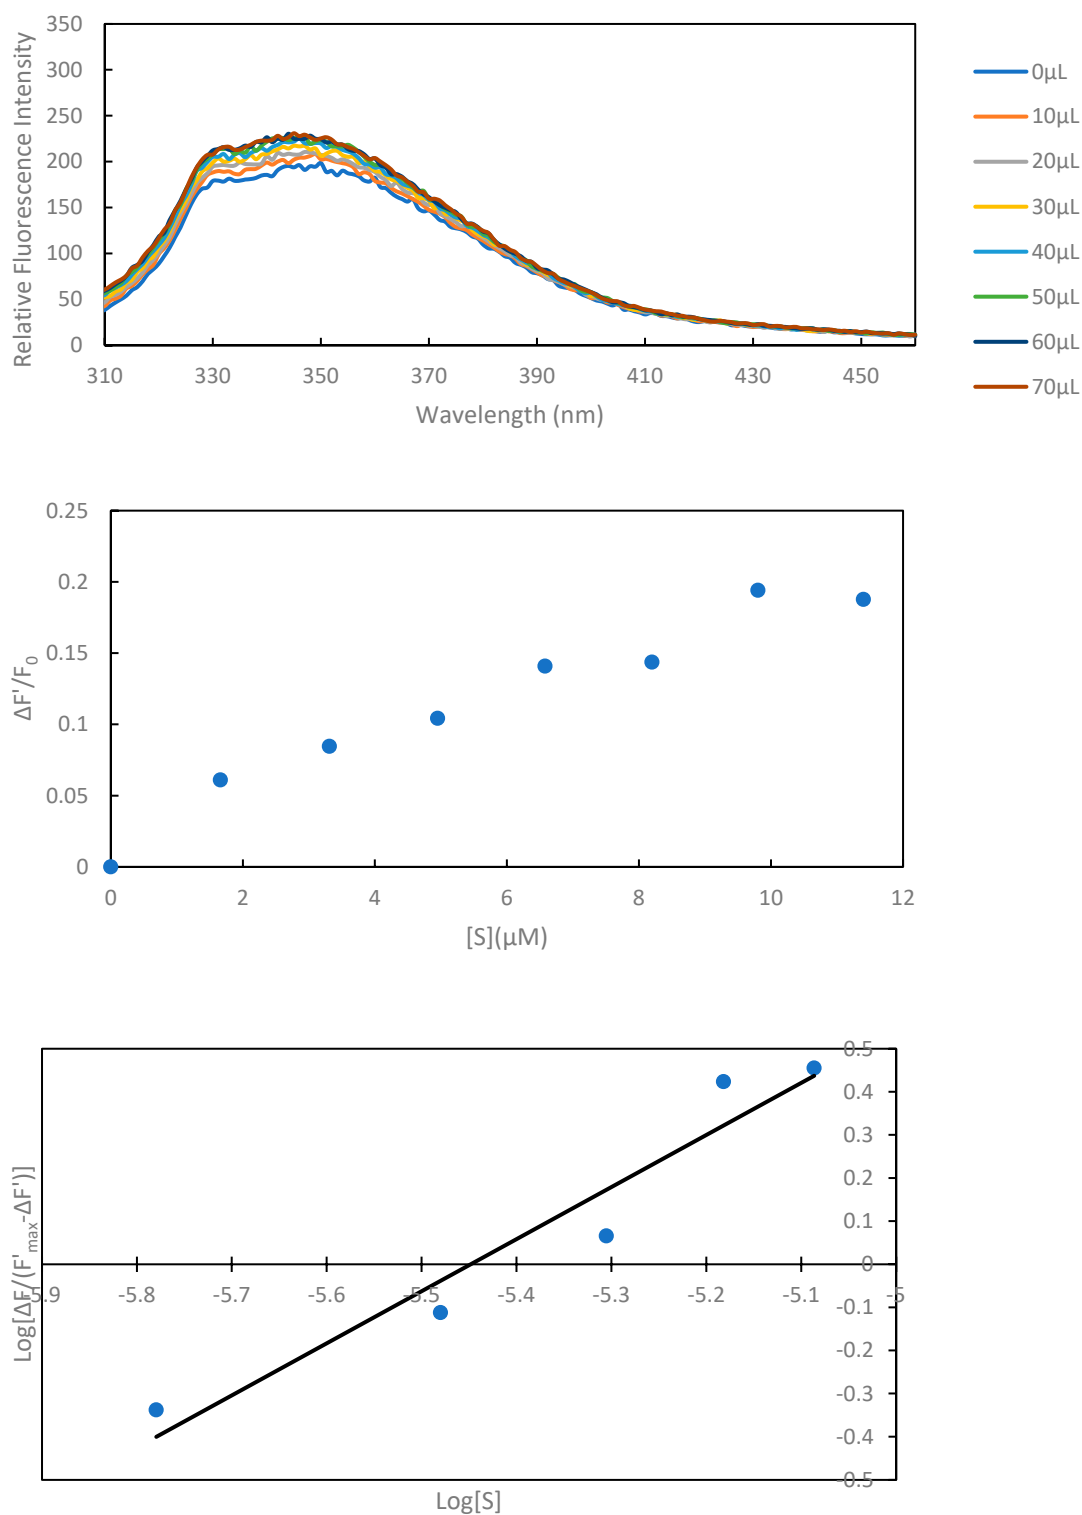

**Figure S25.** Biological evaluations of the WGA—carbohydrate interaction using copolymer **10d**. (Top) Changes in fluorescence emission spectra of WGA (0.65  $\mu\text{M}$ , 3.0 mL, 50 mM Tris-HCl buffer containing 1.25 M NaCl and 25 mM  $\text{CaCl}_2$ , pH 7.5,  $4 \pm 0.1$   $^\circ\text{C}$ ). (Middle) Plots of  $\Delta F'/F_0$  versus  $[S]$ , where  $\Delta F'$  is change in the intensity at 348 nm of WGA with various concentrations,  $F_0$  is the intensity of WGA alone, and  $[S]$  is the total ligand concentration based on the sugar residue concentration. (Bottom) Hill plots of  $\log[\Delta F'/(F'_{\text{max}} - \Delta F')]$  versus  $\log[S]$ .
